# Supplementary material for: Pleiotropic Effects of Common and Rare GCKR Exonic Mutations on Cardiometabolic Traits
Source: MDPI journal article supplement (doi:10.3390/genes13030491), 2022-03-10
Supplement: s1 [file s1]

## **Supplementary Method 1.**

### *Definitions of hypertension, diabetes mellitus, obesity, current smoking, microalbuminuria and metabolic syndrome*

Hypertension was defined as systolic blood pressure (BP) of  $\geq 140$  mmHg, diastolic BP of  $\geq 90$  mmHg or a self-reported history of hypertension. Diabetes mellitus (DM) was defined as a fasting plasma glucose level of  $\geq 126$  mg/dL, a glycohemoglobin value of  $\geq 6.5\%$ , or a self-reported history of DM. Obesity was defined as a BMI of  $\geq 25$  kg/m<sup>2</sup>. Current smoking was defined as regular cigarette smoking at the time of survey. Because of the absence of urine creatinine level, only spot urine albumin level was used for the evaluation of urine albumin. Microalbuminuria was defined as urine albumin of  $\geq 30$  mg/L.

Because medication histories were unavailable, metabolic syndrome characteristics were based on the recent update of the third report of the National Cholesterol Education Program's Adult Treatment Panel III criteria [1] with modifications. Participants with three or more of the following attributes are typically defined as having metabolic syndrome: (1) BP of  $\geq 130/85$  mmHg or a history of hypertension; (2) triglyceride level of  $\geq 150$  mg/dL; (3) high-density lipoprotein cholesterol level of  $< 40$  mg/dL for men or  $< 50$  mg/dL for women; (4) fasting plasma glucose of  $\geq 100$  mg/dL or a history of DM; and (5) waist circumference of  $> 90$  cm for men or  $> 80$  cm for women.

## **Reference:**

1. Grundy SM, Cleeman JI, Daniels SR, Donato KA, Eckel RH, Franklin BA, et al. Diagnosis and management of the metabolic syndrome: an American Heart Association/National Heart, Lung, and Blood Institute Scientific Statement. *Circulation*. 2005; 11: 2735–52.

**Supplementary Table S1.** *GCKR* exonic mutations in Taiwan Biobank participants: Data derived from the Axiom Genome-Wide CHB 1 and 2 Array plates with genotype imputation

| Chr | SNP          | bp (GRCh38) | Ref/Alt | HWE    | MAF    | Exon number | Exonic Function         | mRNA sequence | AA Change.   |
|-----|--------------|-------------|---------|--------|--------|-------------|-------------------------|---------------|--------------|
| 2   | rs8179206    | 27497575    | A / G   | 0.8864 | 0.0272 | 3           | Non-synonymous mutation | c.A230G       | p. Glu77Gly  |
| 2   | rs146175795  | 27498276    | G / A   | 0.3211 | 0.0065 | 4           | Non-synonymous mutation | c.G307A       | p. Val103Met |
| 2   | rs143881585  | 27498323    | G / A   | 0.8717 | 0.0119 | 4           | Synonymous, mutation    | c.G354A       | p. Ser118Ser |
| 2   | rs150673460  | 27498764    | C / T   | 0.5407 | 0.0020 | 4           | Non-synonymous mutation | c.C395T       | p. Pro132Leu |
| 2   | rs149847328  | 27503548    | C / T   | 0.9470 | 0.0002 | 9           | Non-sense mutation      | c.C679T       | p. Arg227X   |
| 2   | rs1414321043 | 27506551    | G / T   | 0.8380 | 0.0007 | 11          | Non-synonymous mutation | c. G940T      | p. Ala314Ser |
| 2   | rs1260326    | 27508073    | T / C   | 0.4474 | 0.4917 | 15          | Non-synonymous mutation | c.T1337C      | p. Leu446Pro |
| 2   | rs146285804  | 27518916    | G / T   | 0.2744 | 0.0019 | 17          | Non-synonymous mutation | c.G1551T      | p. Trp517Cys |

Chr: chromosome, SNP: single nucleotide polymorphism, bp: base pairs, Ref/Alt: reference/alternate allele, HWE: HWE: Hardy-Weinberg equilibrium, MAF: minor allele frequency, mRNA: messenger RNA, AA: amino acid.

**Supplementary Table S2.** Association of *GCKR* rs143881585 genotypes with clinical phenotypes and laboratory parameters

| Clinical and laboratory parameters |                                            | beta    | SE     | <i>P</i> value*        | <i>P</i> value**       |
|------------------------------------|--------------------------------------------|---------|--------|------------------------|------------------------|
| Anthropology                       | Age (years)                                | 0.1003  | 0.2442 | 0.6812                 | 0.5546                 |
|                                    | Waist circumference (cm)                   | -0.0111 | 0.1165 | 0.9241                 | 0.8752                 |
|                                    | Waist-hip ratio                            | 0.0024  | 0.0012 | 0.0458                 | 0.0347                 |
|                                    | Body mass index (kg/m <sup>2</sup> )       | -0.0419 | 0.0830 | 0.6139                 | 0.4739                 |
| Blood Pressure                     | Systolic BP* (mmHg)                        | 0.4918  | 0.3495 | 0.1594                 | 0.0430                 |
|                                    | Diastolic BP* (mmHg)                       | 0.3524  | 0.2279 | 0.1220                 | 0.0377                 |
|                                    | Mean BP* (mmHg)                            | 0.3989  | 0.2504 | 0.1112                 | 0.0276                 |
| Lipid profiles                     | Total cholesterol**** (mg/dL) (mmol/L)     | 0.0030  | 0.0018 | 0.0939                 | 0.0015                 |
|                                    | HDL-cholesterol**** (mg/dL) (mmol/L)       | -0.0037 | 0.0022 | 0.0916                 | 0.0774                 |
|                                    | LDL-cholesterol**** (mg/dL) (mmol/L)       | 0.0024  | 0.0027 | 0.3795                 | 0.0750                 |
|                                    | Triglyceride**** (mg/dL) (mmol/L)          | 0.0327  | 0.0051 | $1.17 \times 10^{-10}$ | $3.69 \times 10^{-22}$ |
| Glucose metabolism                 | Fasting plasma glucose** (mg/dL) (mmol/L)  | 0.0328  | 0.3451 | 0.9244                 | 0.3939                 |
|                                    | HbA1C** (%) (mmole/mol)                    | -0.0131 | 0.0138 | 0.3418                 | 0.2653                 |
| Uric acid                          | Uric acid*** (mg/dL) (mmol/L)              | 0.0249  | 0.0256 | 0.3308                 | 0.0140                 |
| Renal function                     | Creatinine (mg/dL) (mmol/L)                | -0.0024 | 0.0049 | 0.6270                 | 0.1999                 |
|                                    | eGFR (mL/min/1.73 m <sup>2</sup> )         | 0.6747  | 0.4945 | 0.1725                 | 0.0102                 |
|                                    | Urine albumin (mg/L)                       | 0.0168  | 0.0104 | 0.1068                 | 0.0180                 |
| Liver function                     | AST (U/L) (μkat/L)                         | 0.5384  | 0.2770 | 0.0519                 | 0.0073                 |
|                                    | ALT (U/L) (μkat/L)                         | 1.0851  | 0.4280 | 0.0112                 | 0.0024                 |
|                                    | γGT (U/L) (μkat/L)                         | 1.5749  | 0.7106 | 0.0267                 | 0.0012                 |
|                                    | Serum albumin (g/dL) (μmol/L)              | 0.0229  | 0.0051 | $7.00 \times 10^{-6}$  | $1.24 \times 10^{-10}$ |
| Hematological parameters           | Total bilirubin (mg/dL) (μmol/L)           | 0.0115  | 0.0061 | 0.0600                 | 0.0377                 |
|                                    | Leukocyte count (10 <sup>3</sup> /μL)      | 0.0904  | 0.0352 | 0.0102                 | 0.0007                 |
|                                    | Hematocrit (%)                             | 0.1327  | 0.0798 | 0.0962                 | 0.1544                 |
|                                    | Platelet count (10 <sup>3</sup> /μL)       | -0.1899 | 1.3034 | 0.8842                 | 0.4894                 |
|                                    | Red blood cell count (10 <sup>6</sup> /μL) | -0.0197 | 0.0101 | 0.0514                 | 0.0257                 |
|                                    | Hemoglobin (g/dL)                          | 0.0406  | 0.0282 | 0.1494                 | 0.2179                 |

Adjustments and participants recruited for analysis as in Fig 1.

\*Adjusted for age, sex, BMI, and current smoking.

\*\*Further adjusted for rs1260326 genotypes.

Abbreviations: GCKR, glucokinase regulator; SE, standard error; BP, blood pressure; HDL, high-density lipoprotein; LDL, low-density lipoprotein; HbA1C, hemoglobin A1C; eGFR, estimated glomerular filtration rate; BUN, blood urea nitrogen; AST, aspartate aminotransferase; ALT, alanine aminotransferase; γGT, γ-Glutamyl transferase; BMI, body mass index.

**Supplementary Table S3.** Association of *GCKR* rs143881585 genotypes with atherosclerotic risk factors

|                    | GG    | GA    | AA    | beta    | SE     | <i>P1</i> value* | <i>P2</i> value** |
|--------------------|-------|-------|-------|---------|--------|------------------|-------------------|
| Diabetes mellitus  | 9.5%  | 9.5%  | 0.0%  | -0.0286 | 0.0828 | 0.7298           | 0.5914            |
| Hypertension       | 22.4% | 21.9% | 23.1% | -0.0487 | 0.0613 | 0.4269           | 0.8230            |
| Current smoking    | 9.1%  | 8.8%  | 15.4% | -0.0841 | 0.0842 | 0.3178           | 0.3605            |
| Gout               | 3.9%  | 4.3%  | 7.7%  | 0.0525  | 0.1171 | 0.6538           | 0.3364            |
| Microalbuminuria   | 11.3% | 12.1% | 30.8% | 0.1040  | 0.0707 | 0.1414           | 0.0268            |
| Metabolic syndrome | 24.8% | 26.4% | 38.5% | 0.1228  | 0.0599 | 0.0402           | 0.0040            |

\*Adjusted for age, sex, BMI, and current smoking.

Current smoking: adjusted for age, BMI, and sex.

\*\*Further adjusted for rs1260326 genotypes.

**Supplementary Table S4.** Association of the *GCKR* rs8179206 genotypes with clinical phenotypes and laboratory parameters

|                          |                                            | beta    | SE     | <i>P</i> 1 value*     | <i>P</i> 2 value**    | <i>P</i> 3 value***   |
|--------------------------|--------------------------------------------|---------|--------|-----------------------|-----------------------|-----------------------|
| Anthropology             | Age (years)                                | 0.0398  | 0.1637 | 0.8080                | 0.7149                | 0.6885                |
|                          | Waist circumference (cm)                   | 0.0586  | 0.0781 | 0.4528                | 0.3517                | 0.3757                |
|                          | Waist-hip ratio                            | -0.0001 | 0.0008 | 0.8678                | 0.9300                | 0.9092                |
|                          | Body mass index (kg/m <sup>2</sup> )       | -0.0869 | 0.0556 | 0.1183                | 0.0839                | 0.0816                |
| Blood Pressure           | Systolic BP* (mmHg)                        | -0.0659 | 0.2356 | 0.7797                | 0.8790                | 0.8602                |
|                          | Diastolic BP* (mmHg)                       | -0.0051 | 0.1536 | 0.9734                | 0.7312                | 0.7134                |
|                          | Mean BP* (mmHg)                            | -0.0254 | 0.1688 | 0.8805                | 0.7800                | 0.7605                |
| Lipid profiles           | Total cholesterol**** (mg/dL) (mmol/L)     | 0.0022  | 0.0012 | 0.0686                | 0.0031                | 0.0037                |
|                          | HDL-cholesterol**** (mg/dL) (mmol/L)       | 0.0019  | 0.0014 | 0.1944                | 0.2141                | 0.2532                |
|                          | LDL-cholesterol**** (mg/dL) (mmol/L)       | 0.0013  | 0.0018 | 0.4785                | 0.1644                | 0.1952                |
|                          | Triglyceride**** (mg/dL) (mmol/L)          | 0.0096  | 0.0034 | 0.0046                | $1.50 \times 10^{-7}$ | $3.89 \times 10^{-8}$ |
| Glucose metabolism       | Fasting plasma glucose** (mg/dL) (mmol/L)  | -0.5149 | 0.2315 | 0.0261                | 0.0033                | 0.0026                |
|                          | HbA1C** (%) (mmole/mol)                    | 0.0000  | 0.0092 | 0.9964                | 0.9074                | 0.8527                |
| Uric acid                | Uric acid*** (mg/dL) (mmol/L)              | 0.0075  | 0.0171 | 0.6608                | 0.1216                | 0.1266                |
| Renal function           | Creatinine (mg/dL) (mmol/L)                | -0.0020 | 0.0033 | 0.5498                | 0.2348                | 0.2167                |
|                          | eGFR (mL/min/1.73 m <sup>2</sup> )         | 0.3980  | 0.3315 | 0.2299                | 0.0362                | 0.0280                |
|                          | Urine albumin (mg/L)                       | -0.0007 | 0.0070 | 0.9180                | 0.6574                | 0.5972                |
| Liver function           | AST (U/L) (μkat/L)                         | 0.0528  | 0.1857 | 0.7764                | 0.4011                | 0.3996                |
|                          | ALT (U/L) (μkat/L)                         | 0.1913  | 0.2863 | 0.5041                | 0.2949                | 0.2992                |
|                          | γGT (U/L) (μkat/L)                         | 0.1644  | 0.4794 | 0.7316                | 0.2713                | 0.2314                |
|                          | Serum albumin (g/dL) (μmol/L)              | 0.0132  | 0.0034 | $1.19 \times 10^{-4}$ | $1.18 \times 10^{-7}$ | $3.11 \times 10^{-8}$ |
| Hematological parameters | Total bilirubin (mg/dL) (μmol/L)           | 0.0047  | 0.0041 | 0.2543                | 0.2026                | 0.1754                |
|                          | Leukocyte count (10 <sup>3</sup> /μL)      | -0.0218 | 0.0236 | 0.3568                | 0.7316                | 0.8184                |
|                          | Hematocrit (%)                             | -0.0547 | 0.0535 | 0.3063                | 0.2270                | 0.2381                |
|                          | Platelet count (10 <sup>3</sup> /μL)       | 1.1155  | 0.8750 | 0.2024                | 0.0576                | 0.0555                |
|                          | Red blood cell count (10 <sup>6</sup> /μL) | 0.0015  | 0.0068 | 0.8193                | 0.9814                | 0.9975                |
|                          | Hemoglobin (g/dL)                          | 0.0069  | 0.0189 | 0.7146                | 0.8422                | 0.8773                |

Adjustments and participants recruited for the analysis as in Fig 1.

\*Adjusted for age, sex, BMI, and current smoking.

\*\*Further adjusted for rs1260326 genotypes.

\*\*\*Further adjusted for rs1260326 and rs143881585 genotypes.

Abbreviations as in supplementary Table 2

**Supplementary Table S5.** Association of the *GCKR* rs8179206 genotypes with atherosclerotic risk factors

|                        | AA   | GA   | GG   | beta   | SE     | P value* | P2 value** | P3 value*** |
|------------------------|------|------|------|--------|--------|----------|------------|-------------|
| Diabetes mellitus (%)  | 9.5  | 9.6  | 8.1  | 0.0224 | 0.0549 | 0.6835   | 0.7807     | 0.7825      |
| Hypertension (%)       | 22.4 | 22.3 | 16.1 | 0.0037 | 0.0410 | 0.9278   | 0.6077     | 0.5415      |
| Current smoking (%)    | 9.0  | 9.8  | 8.1  | 0.1044 | 0.0549 | 0.0572   | 0.0470     | 0.0398      |
| Gout (%)               | 3.9  | 4.1  | 4.8  | 0.0953 | 0.0807 | 0.2374   | 0.1130     | 0.1309      |
| Microalbuminuria (%)   | 11.3 | 11.5 | 11.3 | 0.0319 | 0.0487 | 0.5126   | 0.2361     | 0.2158      |
| Metabolic syndrome (%) | 24.9 | 24.8 | 24.9 | 0.0327 | 0.0409 | 0.4243   | 0.1601     | 0.1269      |

\*Adjusted for age, sex, BMI, and current smoking.

Current smoking: adjusted for age, BMI, and sex.

\*\*Further adjusted for rs1260326 genotypes.

\*\*\*Further adjusted for rs1260326 and rs143881585 genotypes.

**Supplementary Table S6.** Association between *GCKR* rs1414321043 genotypes and metabolic and hematological phenotypes

| Clinical and laboratory parameters |                                            | beta    | SE     | P value* |
|------------------------------------|--------------------------------------------|---------|--------|----------|
| Anthropology                       | Age (years)                                | 0.6573  | 1.0131 | 0.5165   |
|                                    | Waist circumference (cm)                   | -0.8136 | 0.4835 | 0.0924   |
|                                    | Waist-hip ratio                            | -0.0062 | 0.0051 | 0.2226   |
|                                    | Body mass index (kg/m <sup>2</sup> )       | 0.3311  | 0.3443 | 0.3362   |
| Blood Pressure                     | Systolic BP* (mmHg)                        | -3.4839 | 1.5377 | 0.0235   |
|                                    | Diastolic BP* (mmHg)                       | -0.9871 | 1.0025 | 0.3248   |
|                                    | Mean BP* (mmHg)                            | -1.8194 | 1.1016 | 0.0986   |
| Lipid profiles                     | Total cholesterol**** (mg/dL) (mmol/L)     | 0.0084  | 0.0075 | 0.2611   |
|                                    | HDL-cholesterol**** (mg/dL) (mmol/L)       | 0.0025  | 0.0090 | 0.7856   |
|                                    | LDL-cholesterol**** (mg/dL) (mmol/L)       | 0.0079  | 0.0113 | 0.4813   |
|                                    | Triglyceride**** (mg/dL) (mmol/L)          | 0.0213  | 0.0211 | 0.3107   |
| Glucose metabolism                 | Fasting plasma glucose** (mg/dL) (mmol/L)  | -0.4794 | 1.4289 | 0.7372   |
|                                    | HbA1C** (%) (mmole/mol)                    | 0.0138  | 0.0570 | 0.8086   |
| Uric acid                          | Uric acid*** (mg/dL) (mmol/L)              | 0.1636  | 0.1046 | 0.1179   |
| Renal function                     | Creatinine (mg/dL) (mmol/L)                | -0.0062 | 0.0203 | 0.7612   |
|                                    | eGFR (mL/min/1.73 m <sup>2</sup> )         | 0.6108  | 2.0518 | 0.7659   |
|                                    | Urine albumin (mg/L)                       | -0.0029 | 0.0433 | 0.9465   |
| Liver function                     | AST (U/L) (μkat/L)                         | 1.2083  | 1.1503 | 0.2935   |
|                                    | ALT (U/L) (μkat/L)                         | 2.1065  | 1.7755 | 0.2355   |
|                                    | γGT (U/L) (μkat/L)                         | 1.2968  | 2.9613 | 0.6615   |
|                                    | Serum albumin (g/dL) (μmol/ L)             | 0.0246  | 0.0212 | 0.2450   |
| Hematological parameters           | Total bilirubin (mg/dL) (μmol/ L)          | -0.0290 | 0.0254 | 0.2543   |
|                                    | Leukocyte count (10 <sup>3</sup> /μL)      | -0.0095 | 0.1461 | 0.9480   |
|                                    | Hematocrit (%)                             | -0.1980 | 0.3310 | 0.5498   |
|                                    | Platelet count (10 <sup>3</sup> /μL)       | 1.7015  | 5.4072 | 0.7530   |
|                                    | Red blood cell count (10 <sup>6</sup> /μL) | -0.0262 | 0.0419 | 0.5317   |
|                                    | Hemoglobin (g/dL)                          | 0.0292  | 0.1168 | 0.8023   |

Adjustments and participants recruited for the analysis as in Fig 1.

\*Adjusted for age, sex, BMI, and current smoking.

Abbreviations as in supplementary Table 2

**Supplementary Table S7.** Association between *GCKR* rs1414321043 genotypes and atherosclerotic risk factors

|                        | GG    | TG    | beta    | SE     | <i>P</i> value* |
|------------------------|-------|-------|---------|--------|-----------------|
| Diabetes mellitus (%)  | 9.5%  | 12.6% | 0.2080  | 0.3039 | 0.4937          |
| Hypertension (%)       | 22.4% | 29.7% | 0.2904  | 0.2369 | 0.2204          |
| Current smoking (%)    | 9.1%  | 5.4%  | -0.6929 | 0.4324 | 0.1091          |
| Gout (%)               | 3.9%  | 1.8%  | -1.0512 | 0.7245 | 0.1468          |
| Microalbuminuria (%)   | 11.3% | 13.5% | 0.1609  | 0.2816 | 0.5677          |
| Metabolic syndrome (%) | 22.2% | 26.1% | 0.1019  | 0.2477 | 0.6808          |

\*Adjusted for age, sex, BMI, and current smoking.

Current smoking: adjusted for age, BMI, and sex.



**Supplementary Table S8.** Association of the *GCKR* rs146175795 genotypes with metabolic and hematological phenotypes

| Clinical and laboratory parameters |                                            | beta    | SE     | P value*              |
|------------------------------------|--------------------------------------------|---------|--------|-----------------------|
| Anthropology                       | Age (years)                                | -0.4926 | 0.3296 | 0.1351                |
|                                    | Waist circumference (cm)                   | -0.1277 | 0.1573 | 0.4167                |
|                                    | Waist-hip ratio                            | 0.0017  | 0.0016 | 0.2988                |
|                                    | Body mass index (kg/m <sup>2</sup> )       | -0.1249 | 0.1120 | 0.2648                |
| Blood Pressure                     | Systolic BP* (mmHg)                        | 0.9074  | 0.4770 | 0.0571                |
|                                    | Diastolic BP* (mmHg)                       | 0.4283  | 0.3110 | 0.1685                |
|                                    | Mean BP* (mmHg)                            | 0.5880  | 0.3418 | 0.0854                |
| Lipid profiles                     | Total cholesterol**** (mg/dL) (mmol/L)     | 0.0034  | 0.0025 | 0.1696                |
|                                    | HDL-cholesterol**** (mg/dL) (mmol/L)       | -0.0065 | 0.0030 | 0.0275                |
|                                    | LDL-cholesterol**** (mg/dL) (mmol/L)       | 0.0044  | 0.0037 | 0.2370                |
|                                    | Triglyceride**** (mg/dL) (mmol/L)          | 0.0300  | 0.0069 | $1.50 \times 10^{-5}$ |
| Glucose metabolism                 | Fasting plasma glucose** (mg/dL) (mmol/L)  | -0.0397 | 0.4679 | 0.9324                |
|                                    | HbA1C** (%) (mmole/mol)                    | 0.0057  | 0.0187 | 0.7613                |
| Uric acid                          | Uric acid*** (mg/dL) (mmol/L)              | 0.0500  | 0.0345 | 0.1474                |
| Renal function                     | Creatinine (mg/dL) (mmol/L)                | -0.0092 | 0.0066 | 0.1646                |
|                                    | eGFR (mL/min/1.73 m <sup>2</sup> )         | 1.3894  | 0.6675 | 0.0374                |
|                                    | Urine albumin (mg/L)                       | 0.0225  | 0.0141 | 0.1094                |
| Liver function                     | AST (U/L) (μkat/L)                         | 0.2895  | 0.3744 | 0.4395                |
|                                    | ALT (U/L) (μkat/L)                         | -0.0169 | 0.5776 | 0.9766                |
|                                    | γGT (U/L) (μkat/L)                         | 0.1060  | 0.9641 | 0.9124                |
|                                    | Serum albumin (g/dL) (μmol/ L)             | 0.0285  | 0.0069 | $3.50 \times 10^{-5}$ |
| Hematological parameters           | Total bilirubin (mg/dL) (μmol/ L)          | 0.0005  | 0.0083 | 0.9478                |
|                                    | Leukocyte count (10 <sup>3</sup> /μL)      | -0.0258 | 0.0475 | 0.5876                |
|                                    | Hematocrit (%)                             | -0.3161 | 0.1077 | 0.0033                |
|                                    | Platelet count (10 <sup>3</sup> /μL)       | 2.4589  | 1.7612 | 0.1627                |
|                                    | Red blood cell count (10 <sup>6</sup> /μL) | -0.0116 | 0.0136 | 0.3940                |
|                                    | Hemoglobin (g/dL)                          | -0.0824 | 0.0380 | 0.0302                |

Adjustments and participants recruited for the analysis as in Fig 1.

\*Adjusted for age, sex, BMI, and current smoking.

Abbreviations as in supplementary Table 2

**Supplementary Table S9.** Association of the *GCKR* rs146175795 genotypes and atherosclerotic risk factors

|                        | GG    | GA    | AA    | beta    | SE     | <i>P</i> value* |
|------------------------|-------|-------|-------|---------|--------|-----------------|
| Diabetes mellitus (%)  | 9.5%  | 10.8% | 50.0% | 0.2378  | 0.1044 | 0.0227          |
| Hypertension (%)       | 22.4% | 23.4% | 100%  | 0.1495  | 0.0811 | 0.0653          |
| Current smoking (%)    | 9.1%  | 9.1%  | 0.0%  | -0.0325 | 0.1130 | 0.7739          |
| Gout (%)               | 3.9%  | 4.4%  | 0.0%  | 0.1322  | 0.1573 | 0.4006          |
| Microalbuminuria (%)   | 11.3% | 12.4% | 0.0%  | 0.1350  | 0.0951 | 0.1555          |
| Metabolic syndrome (%) | 22.2% | 24.7% | 100%  | 0.2872  | 0.0822 | 0.0005          |

\*Adjusted for age, sex, BMI, and current smoking.

Current smoking: adjusted for age, BMI, and sex.

**Supplementary Table S10.** Association of the *GCKR* rs150673460 genotypes with metabolic and hematological phenotypes

| Clinical and laboratory parameters |                                            | beta    | SE     | P value*              |
|------------------------------------|--------------------------------------------|---------|--------|-----------------------|
| Anthropology                       | Age (years)                                | 0.3270  | 0.5947 | 0.5825                |
|                                    | Waist circumference (cm)                   | 0.3579  | 0.2837 | 0.2072                |
|                                    | Waist-hip ratio                            | 0.0049  | 0.0030 | 0.1000                |
|                                    | Body mass index (kg/m <sup>2</sup> )       | -0.0994 | 0.2021 | 0.6227                |
| Blood Pressure                     | Systolic BP* (mmHg)                        | -0.5148 | 0.8494 | 0.5445                |
|                                    | Diastolic BP* (mmHg)                       | -0.6235 | 0.5538 | 0.2602                |
|                                    | Mean BP* (mmHg)                            | -0.5873 | 0.6086 | 0.3345                |
| Lipid profiles                     | Total cholesterol**** (mg/dL) (mmol/L)     | 0.0085  | 0.0045 | 0.0575                |
|                                    | HDL-cholesterol**** (mg/dL) (mmol/L)       | -0.0037 | 0.0054 | 0.4928                |
|                                    | LDL-cholesterol**** (mg/dL) (mmol/L)       | 0.0062  | 0.0067 | 0.3576                |
|                                    | Triglyceride**** (mg/dL) (mmol/L)          | 0.0526  | 0.0125 | $2.70 \times 10^{-5}$ |
| Glucose metabolism                 | Fasting plasma glucose** (mg/dL) (mmol/L)  | 0.5406  | 0.8439 | 0.5217                |
|                                    | HbA1C** (%) (mmole/mol)                    | 0.0396  | 0.0336 | 0.2386                |
| Uric acid                          | Uric acid*** (mg/dL) (mmol/L)              | 0.0075  | 0.0631 | 0.9050                |
| Renal function                     | Creatinine (mg/dL) (mmol/L)                | 0.0050  | 0.0119 | 0.6732                |
|                                    | eGFR (mL/min/1.73 m <sup>2</sup> )         | 1.2388  | 1.2044 | 0.3037                |
|                                    | Urine albumin (mg/L)                       | 0.0442  | 0.0254 | 0.0816                |
| Liver function                     | AST (U/L) (μkat/L)                         | 0.5700  | 0.6754 | 0.3987                |
|                                    | ALT (U/L) (μkat/L)                         | 1.1304  | 1.0415 | 0.2778                |
|                                    | γGT (U/L) (μkat/L)                         | 2.5694  | 1.7331 | 0.1382                |
|                                    | Serum albumin (g/dL) (μmol/ L)             | 0.0253  | 0.0124 | 0.0419                |
| Hematological parameters           | Total bilirubin (mg/dL) (μmol/ L)          | 0.0310  | 0.0149 | 0.0382                |
|                                    | Leukocyte count (10 <sup>3</sup> /μL)      | 0.1691  | 0.0857 | 0.0486                |
|                                    | Hematocrit (%)                             | 0.1198  | 0.1943 | 0.5376                |
|                                    | Platelet count (10 <sup>3</sup> /μL)       | 1.5441  | 3.1781 | 0.6271                |
|                                    | Red blood cell count (10 <sup>6</sup> /μL) | 0.0225  | 0.0246 | 0.3601                |
|                                    | Hemoglobin (g/dL)                          | 0.0437  | 0.0686 | 0.5241                |

Adjustments and participants recruited for the analysis as in Fig 1.

\*Adjusted for age, sex, BMI, and current smoking.

Abbreviations as in supplementary Table 2

**Supplementary Table S11.** Association of the *GCKR* rs150673460 genotypes and atherosclerotic risk factors

|                        | CC    | CT    | beta    | SE     | <i>P</i> value* |
|------------------------|-------|-------|---------|--------|-----------------|
| Diabetes mellitus (%)  | 90.5% | 89.8% | 0.0945  | 0.1956 | 0.6289          |
| Hypertension (%)       | 22.4% | 21.1% | -0.0851 | 0.1512 | 0.5735          |
| Current smoking (%)    | 9.1%  | 9.3%  | 0.1983  | 0.2331 | 0.3949          |
| Gout (%)               | 3.9%  | 7.1%  | 0.7106  | 0.2321 | 0.0022          |
| Microalbuminuria (%)   | 11.3% | 12.1% | 0.0804  | 0.1738 | 0.6437          |
| Metabolic syndrome (%) | 22.2% | 22.6% | 0.0804  | 0.1738 | 0.6437          |

\*Adjusted for age, sex, BMI, and current smoking.

Current smoking: adjusted for age, BMI, and sex.

**Supplementary Table S12.** Association of the *GCKR* rs149847328 genotypes with metabolic and hematological phenotypes

| Clinical and laboratory parameters |                                            | beta    | SE     | P value* |
|------------------------------------|--------------------------------------------|---------|--------|----------|
| Anthropology                       | Age (years)                                | 2.2046  | 1.7538 | 0.2087   |
|                                    | Waist circumference (cm)                   | 1.0107  | 0.8371 | 0.2273   |
|                                    | Waist-hip ratio                            | 0.0076  | 0.0087 | 0.3836   |
|                                    | Body mass index (kg/m <sup>2</sup> )       | 1.0528  | 0.5960 | 0.0773   |
| Blood Pressure                     | Systolic BP* (mmHg)                        | -2.1274 | 2.7589 | 0.4407   |
|                                    | Diastolic BP* (mmHg)                       | -0.3234 | 1.7985 | 0.8573   |
|                                    | Mean BP* (mmHg)                            | -0.9248 | 1.9765 | 0.6399   |
| Lipid profiles                     | Total cholesterol**** (mg/dL) (mmol/L)     | 0.0039  | 0.0130 | 0.7636   |
|                                    | HDL-cholesterol**** (mg/dL) (mmol/L)       | -0.0006 | 0.0156 | 0.9687   |
|                                    | LDL-cholesterol**** (mg/dL) (mmol/L)       | 0.0148  | 0.0195 | 0.4468   |
|                                    | Triglyceride**** (mg/dL) (mmol/L)          | 0.0160  | 0.0365 | 0.6604   |
| Glucose metabolism                 | Fasting plasma glucose** (mg/dL) (mmol/L)  | -2.8907 | 2.5214 | 0.2516   |
|                                    | HbA1C** (%) (mmole/mol)                    | -0.0604 | 0.1005 | 0.5481   |
| Uric acid                          | Uric acid*** (mg/dL) (mmol/L)              | 0.0789  | 0.1961 | 0.6873   |
| Renal function                     | Creatinine (mg/dL) (mmol/L)                | 0.0146  | 0.0352 | 0.6789   |
|                                    | eGFR (mL/min/1.73 m <sup>2</sup> )         | -2.5759 | 3.5523 | 0.4684   |
|                                    | Urine albumin (mg/L)                       | 0.1967  | 0.0749 | 0.0087   |
| Liver function                     | AST (U/L) (μkat/L)                         | -1.9899 | 1.9918 | 0.3178   |
|                                    | ALT (U/L) (μkat/L)                         | -3.4733 | 3.0736 | 0.2585   |
|                                    | γGT (U/L) (μkat/L)                         | 0.5825  | 5.1284 | 0.9096   |
|                                    | Serum albumin (g/dL) (μmol/ L)             | 0.0329  | 0.0367 | 0.3705   |
| Hematological parameters           | Total bilirubin (mg/dL) (μmol/ L)          | -0.0462 | 0.0440 | 0.2942   |
|                                    | Leukocyte count (10 <sup>3</sup> /μL)      | 0.0614  | 0.2529 | 0.8083   |
|                                    | Hematocrit (%)                             | -0.8675 | 0.5731 | 0.1301   |
|                                    | Platelet count (10 <sup>3</sup> /μL)       | 5.6052  | 9.3713 | 0.5498   |
|                                    | Red blood cell count (10 <sup>6</sup> /μL) | 0.0365  | 0.0725 | 0.6145   |
|                                    | Hemoglobin (g/dL)                          | -0.1769 | 0.2022 | 0.3818   |

Adjustments and participants recruited for the analysis as in Fig 1.

\*Adjusted for age, sex, BMI, and current smoking.

Abbreviations as in supplementary Table 2

**Supplementary Table S13.** Association between *GCKR* rs149847328 genotypes and atherosclerotic risk factors

| Genotypes              | CC    | TC    | beta    | SE     | <i>P</i> value* |
|------------------------|-------|-------|---------|--------|-----------------|
| Diabetes mellitus (%)  | 9.5%  | 16.2% | 0.2804  | 0.4836 | 0.5620          |
| Hypertension (%)       | 22.4% | 27.0% | -0.1478 | 0.4281 | 0.7299          |
| Current smoking (%)    | 9.1%  | 5.4%  | -0.5701 | 0.7488 | 0.4465          |
| Gout (%)               | 3.9%  | 16.2% | 1.4906  | 0.5170 | 0.0039          |
| Microalbuminuria (%)   | 11.3% | 18.9% | 0.4629  | 0.4269 | 0.2782          |
| Metabolic syndrome (%) | 22.2% | 27.0% | -0.1711 | 0.4305 | 0.6910          |

\*Adjusted for age, sex, BMI, and current smoking.

Current smoking: adjusted for age, BMI, and sex.

**Supplementary Table S14.** Association of the *GCKR* rs146285804 genotypes with metabolic and hematological phenotypes

| Clinical and laboratory parameters |                                            | beta    | SE     | P value* |
|------------------------------------|--------------------------------------------|---------|--------|----------|
| Anthropology                       | Age (years)                                | -0.1566 | 0.6061 | 0.7962   |
|                                    | Waist circumference (cm)                   | -0.2911 | 0.2891 | 0.3139   |
|                                    | Waist-hip ratio                            | -0.0048 | 0.0030 | 0.1121   |
|                                    | Body mass index (kg/m <sup>2</sup> )       | -0.0017 | 0.2059 | 0.9936   |
| Blood Pressure                     | Systolic BP* (mmHg)                        | 1.1218  | 0.8660 | 0.1952   |
|                                    | Diastolic BP* (mmHg)                       | 0.4826  | 0.5649 | 0.3929   |
|                                    | Mean BP* (mmHg)                            | 0.6957  | 0.6206 | 0.2623   |
| Lipid profiles                     | Total cholesterol**** (mg/dL) (mmol/L)     | 0.0076  | 0.0045 | 0.0911   |
|                                    | HDL-cholesterol**** (mg/dL) (mmol/L)       | 0.0019  | 0.0054 | 0.7247   |
|                                    | LDL-cholesterol**** (mg/dL) (mmol/L)       | 0.0099  | 0.0067 | 0.1399   |
|                                    | Triglyceride**** (mg/dL) (mmol/L)          | 0.0196  | 0.0125 | 0.1178   |
| Glucose metabolism                 | Fasting plasma glucose** (mg/dL) (mmol/L)  | -0.6971 | 0.8572 | 0.4161   |
|                                    | HbA1C** (%) (mmole/mol)                    | -0.0539 | 0.0342 | 0.1150   |
| Uric acid                          | Uric acid*** (mg/dL) (mmol/L)              | 0.0926  | 0.0628 | 0.1404   |
| Renal function                     | Creatinine (mg/dL) (mmol/L)                | 0.0075  | 0.0122 | 0.5393   |
|                                    | eGFR (mL/min/1.73 m <sup>2</sup> )         | -0.3243 | 1.2272 | 0.7916   |
|                                    | Urine albumin (mg/L)                       | -0.0213 | 0.0259 | 0.4113   |
| Liver function                     | AST (U/L) (μkat/L)                         | 0.3561  | 0.6886 | 0.6050   |
|                                    | ALT (U/L) (μkat/L)                         | -0.1227 | 1.0614 | 0.9080   |
|                                    | γGT (U/L) (μkat/L)                         | -0.6704 | 1.7729 | 0.7053   |
|                                    | Serum albumin (g/dL) (μmol/ L)             | 0.0029  | 0.0127 | 0.8214   |
| Hematological parameters           | Total bilirubin (mg/dL) (μmol/ L)          | 0.0029  | 0.0152 | 0.8497   |
|                                    | Leukocyte count (10 <sup>3</sup> /μL)      | 0.0030  | 0.0874 | 0.9724   |
|                                    | Hematocrit (%)                             | 0.0097  | 0.1981 | 0.9611   |
|                                    | Platelet count (10 <sup>3</sup> /μL)       | -5.6662 | 3.2367 | 0.0800   |
|                                    | Red blood cell count (10 <sup>6</sup> /μL) | -0.0118 | 0.0251 | 0.6381   |
|                                    | Hemoglobin (g/dL)                          | 0.0218  | 0.0699 | 0.7545   |

Adjustments and participants recruited for the analysis as in Fig 1.

\*Adjusted for age, sex, BMI, and current smoking.

Abbreviations as in supplementary Table 2

**Supplementary Table S15.** Association of the *GCKR* rs146285804 genotypes and atherosclerotic risk factors

| Genotypes              | GG    | TG    | beta    | SE     | <i>P</i> value* |
|------------------------|-------|-------|---------|--------|-----------------|
| Diabetes mellitus (%)  | 9.5%  | 8.7%  | -0.0579 | 0.2111 | 0.7839          |
| Hypertension (%)       | 22.4% | 23.2% | 0.1052  | 0.1487 | 0.4793          |
| Current smoking (%)    | 9.1%  | 7.7%  | -0.1396 | 0.2233 | 0.5318          |
| Gout (%)               | 3.9%  | 2.6%  | -0.3260 | 0.3676 | 0.3752          |
| Microalbuminuria (%)   | 11.3% | 9.0%  | -0.2515 | 0.2008 | 0.2103          |
| Metabolic syndrome (%) | 22.2% | 20.9% | -0.0544 | 0.1606 | 0.7346          |

\*Adjusted for age, sex, BMI, and current smoking.

Current smoking: adjusted for age, BMI, and sex.



**Supplementary Table S16.** Logistic regression analysis for metabolic syndrome, including genotypes, in 81,097 participants

|                                      | OR (95%, CI)             | <i>P</i> value                 |
|--------------------------------------|--------------------------|--------------------------------|
| Age (years)                          | 1.0619 (1.0598 - 1.0640) | $< 10^{-307}$                  |
| Sex (male vs. female)                | 1.1016 (1.0572 - 1.1479) | $4.13 \times 10^{-06}$         |
| Body mass index (kg/m <sup>2</sup> ) | 1.3936 (1.3851 - 1.4022) | $< 10^{-307}$                  |
| Current smoking (%)                  | 1.6919 (1.5861 - 1.8048) | $2.32 \times 10^{-57}$         |
| rs1260326 (TT vs. TC vs. CC)         | 1.0880 (1.0587 - 1.1181) | $1.43\text{E} \times 10^{-09}$ |
| WGRS-GCKR*                           | 3.3317 (2.0323 - 5.4620) | $1.83 \times 10^{-06}$         |

WGRS-GCKR: weighted genetic risk scores derived from the combination of *GCKR* rs143881585 and rs1461755795 variants
